# Supplementary material for: Synthesis, characterisation and reactivity of the first diphosphaalkyneElectronic supplementary information (ESI) available: Synthesis of compounds 1, 2, 3 and 5. See http://www.rsc.org/suppdata/dt/b3/b309061b/
Source: Royal Society of Chemistry journal article supplement (doi:10.1039/b309061b), 2003-01-01
Supplement: b309061b.doc [file b309061b.doc]

**Synthesis, Characterisation and Reactivity of the First Diphosphaalkyne**

# Markus Brym and Cameron Jones*

# SUPPLEMENTARY MATERIAL

## Synthesis of 1

To a solution of LiP(SiMe3)2DME (1.45 g, 5.2 mmol) in cyclohexane (30 ml) was added a suspension of 9,10-triptycene dicarbonyl chloride1 (1.00 g, 2.6 mmol) in cyclohexane (50 ml) at 5 °C. An immediate colour change to yellow orange was observed. The suspension was allowed to warm to ambient temperature, stirred overnight and filtered. Volatiles were removed from the filtrate *in vacuo* to yield **1** as a pale yellow oil (1.65g, 95%). The 31P{1H} NMR spectrum of this oil displayed 4 singlet resonances ( 148.1, 148.6, 158.5, 159.5 ppm) which is consistent with **1** existing as a mixture of its *Z*,*Z*-, *Z*,*E*- and *E*,*E-*isomers. No further characterisation of the mixture was attempted and it was used for the synthesis of **2**.

## Synthesis of 2

To a solution of **1** (1.65g, 2.5 mmol) in DME (60 ml) was added a catalytic amount of KOH (50 mg) and the resulting mixture stirred for 4 hours. Volatiles were removed from the mixture *in vacuo* and the residue washed with hexane (10ml), extracted into Et2O (80 ml), filtered and the diethyl ether removed from the filtrate *in vacuo*. The resultant residue was dissolved in toluene (20 ml) and the solution cooled to –30oC overnight to yield **2** as colourless crystals, (0.60g, 67%).

## Synthesis of 3

To a solution of (PPh3)2Pt(C2H4) (100 mg, 0.13 mmol) in toluene (20 ml) at -78 °C was added a solution of **2** (23 mg, 0.07 mmol) in toluene (10 ml) over 5 mins. The resultant solution was allowed to warm to ambient temperature and stirred 4 hours. Volatiles were then removed *in vacuo,* the residue washed with hexane and dissolved in CH2Cl2 (10 ml). Layering of this solution with diethyl ether resulted in the deposition of cream coloured crystals of **3**, (87 mg, 70%).

## Synthesis of 5

To a solution of RuHCl(CO)(PPh3)3 (200 mg, 0.2 mmol) in CH2Cl2 (20 ml) at -78 °C was added a solution of **2** (35 mg, 0.1 mmol) in CH2Cl2 (10 ml) over 5 mins. The resultant solution was allowed to warm to ambient temperature during which time a colour change to deep orange was observed, and the solution was then stirred overnight. Volatiles were removed *in vacuo,* the residue washed twice with hexane (2 x 20 ml) and diethyl ether (20 ml) to leave **5** as an orange microcrystalline solid.(146 mg, 85%)

Spectroscopic data for **2**, **3** and **5** can be found in the main text. The interpretation of the 13C NMR spectra of **3** and **5** proved difficult due to the low solubility of both compounds in standard deuterated solvents and the presence of many overlapping multiplet resonances. Reproducible microanaylses for these two compounds could not be obtained due to the presence of diethyl ether and dichlormethane of crystallisation in **3** and **5** respectively. Despite this, the available spectroscopic data pointed towards the bulk materials having a purity in excess of 97%.

1. E. Hoffmeister, *J. Polym. Sci., Polym. Chem.*, 1969, **7**, 55.
